# Supplementary material for: Daily evaluation of 26 precipitation datasets using Stage-IVgauge-radar data for the CONUS
Source: Copernicus journal article supplement (doi:10.5194/hess-2018-481), 2018-09-27
Supplement: Supplementary file 1 [file hess-2018-481-supplement.pdf]

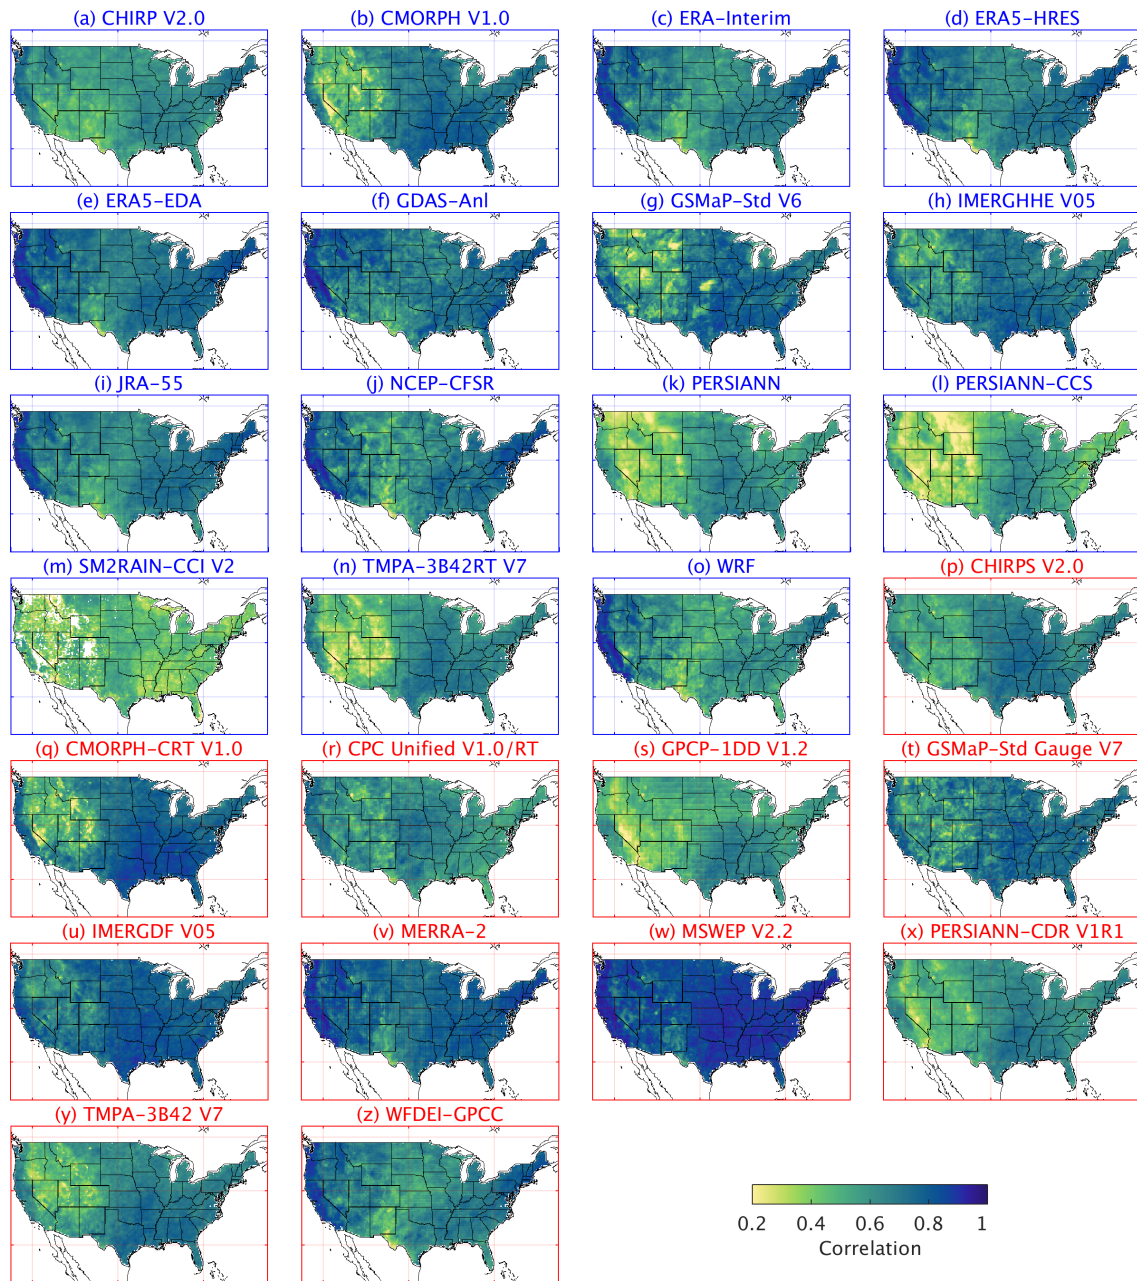

**Supplement Figure S1.** Correlations for the 26 gridded  $P$  datasets using the Stage-IV gauge-radar dataset as reference. White indicates missing data. Higher correlations correspond to better performance. Uncorrected datasets are listed in blue, whereas gauge-corrected datasets are listed in red.

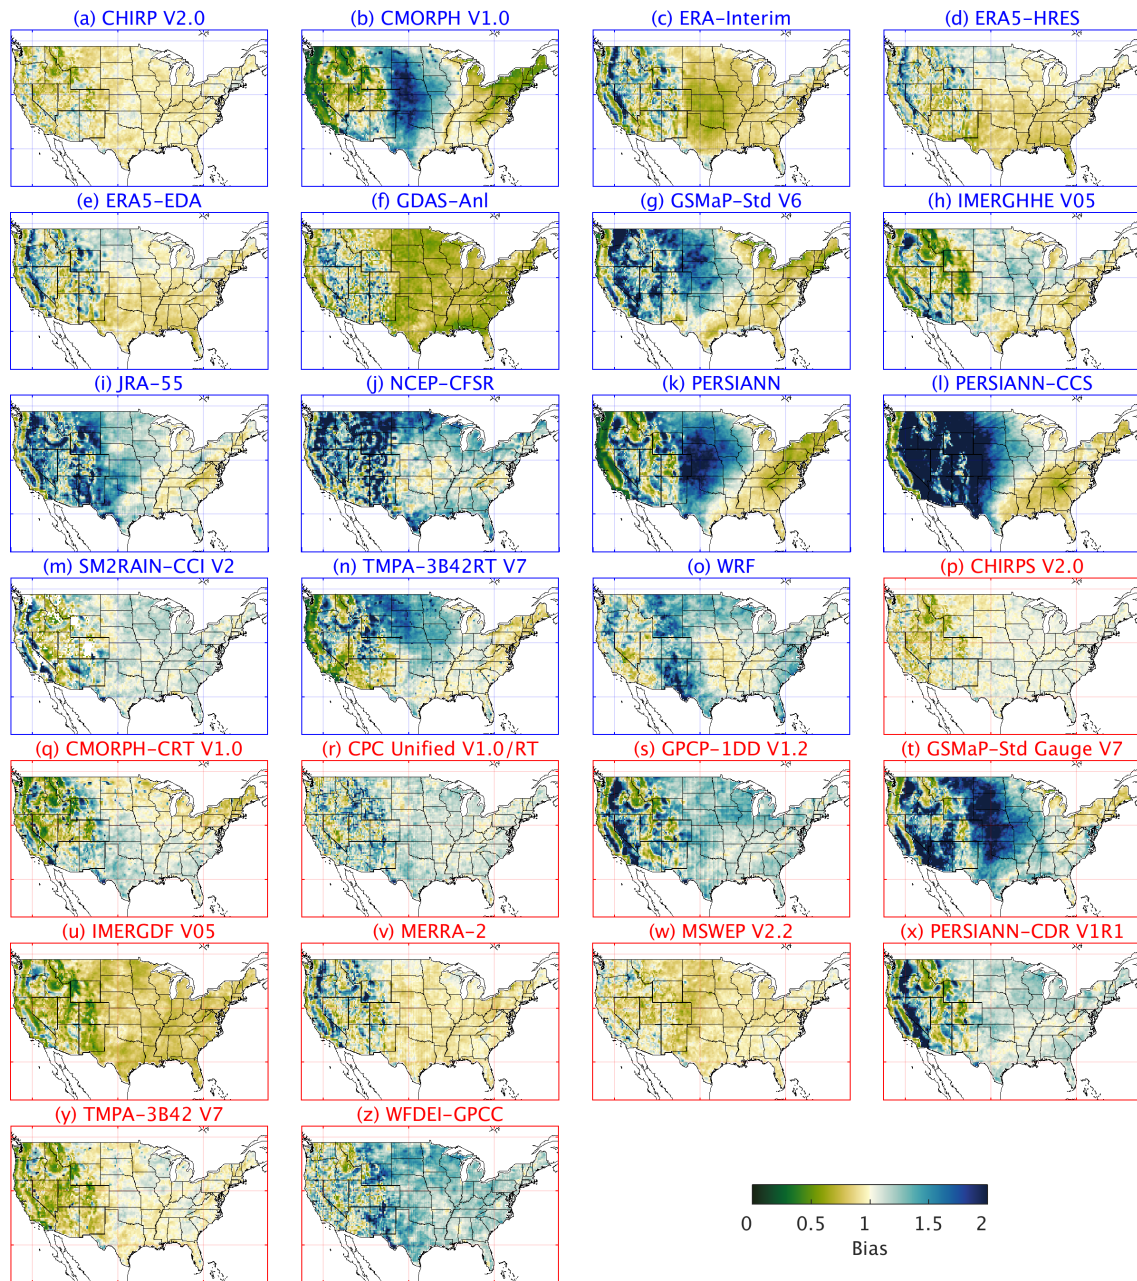

**Supplement Figure S2.** Bias values for the 26 gridded  $P$  datasets using the Stage-IV gauge-radar dataset as reference. White indicates missing data. Values closer to 1 correspond to better performance. Uncorrected datasets are listed in blue, whereas gauge-corrected datasets are listed in red.

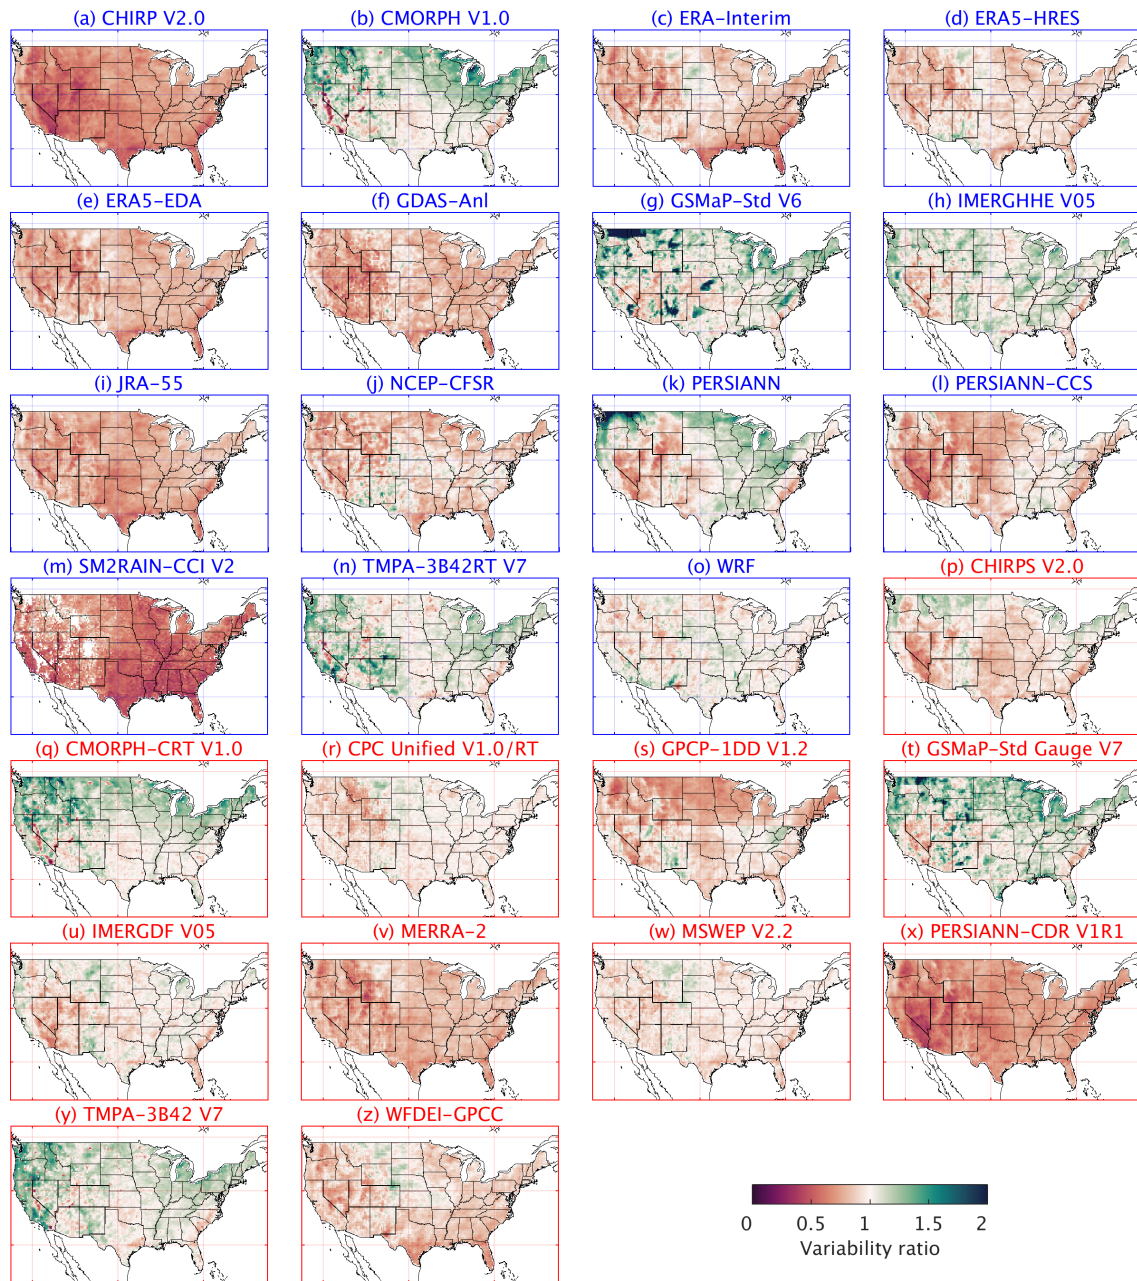

**Supplement Figure S3.** Variability ratios for the 26 gridded  $P$  datasets using the Stage-IV gauge-radar dataset as reference. White indicates missing data. Values closer to 1 correspond to better performance. Uncorrected datasets are listed in blue, whereas gauge-corrected datasets are listed in red.
